# Supplementary material
Source: PubMed Central journal article supplement (PMC3921594)
Supplement: cdd2013167x2.pdf [file cdd2013167x2.pdf]

**Table S1. Oligonucleotides used in this study**

| Gene        | Oligo name          | Sequence forward oligo (5'-3')         | Oligo name       | Sequence reverse oligo (5'-3')                   | Use                 |
|-------------|---------------------|----------------------------------------|------------------|--------------------------------------------------|---------------------|
| MCM7        | OLEY306             | CCGACCGAGACAATGACCTAC                  | OLEY307          | CTCCACCACATCC ACCATTC                            | QPCR                |
| SIX1        | OLEY431             | AAGGAGAAGTCGAGGGGTGT                   | OLEY432          | TGCTTGTTGGAGGAGGAGTT                             | QPCR                |
| FOXA1       | OLEY413             | GTGGCTCCAGGATGTTAGGA                   | OLEY414          | GCCTGAGTTCATGTTGCTGA                             | QPCR                |
| RUNX1       | OLEY415             | GGCTGGCAATGATGAAAACCT                  | OLEY416          | TGATGGCTCTGTGGTAGGTG                             | QPCR                |
| EP300       | OLEY417             | AGCCAAGCGGCCTAAAACCT                   | OLEY418          | TCACCACCATTGGTTAGTCCC                            | QPCR                |
| RPS14       | OLEY373             | TCACCGCCCTACACATCAAACCT                | OLEY374          | CTGCGAGTGCTGTCAGAGG                              | QPCR                |
| SMAD7       | OLEY480             | ATGCTGTGCCCTTCCCTCCGCTG                | OLEY481          | CCACGCACCAGTGTGACCGA                             | QPCR                |
| VIM         | VIMs                | ACATTGAGATTGCCACCT                     | VIMas            | TCCAGATTAGTTTCCCTCAAG                            | QPCR                |
| JAG1        | CDH1s               | GATTCTGCTGCTCTTGCT                     | CDH1as           | GTCAAAGTCCTGGTCCTC                               | QPCR                |
| SNAI1       | OLEY442             | AGGCCATGTCCGGACCCACA                   | OLEY443          | GTGGAGCAGGGACATTCCGGGA                           | QPCR                |
| ATF3        | OLEY444             | CACAGTCGCACGCAGCCA                     | OLEY445          | CCTGGCCTGGGTGTTGAAGCA                            | QPCR                |
| ATF4        | OLEY446             | CTCCGGGACAGATTGGATGTT                  | OLEY447          | GGCTGCTTATTAGTCTCCTGGAC                          | QPCR                |
| PPARA       | OLEY448             | AGGGCCCTGTCTGCTCTGTGG                  | OLEY449          | GCCGCCGAGCTCCAAGCTAC                             | QPCR                |
| PTK2B       | OLEY450             | TGCTCGCTACCGAACCCCA                    | OLEY451          | CCTCTGGAACTGCAGCTTTGG                            | QPCR                |
| MSX2        | OLEY452             | ATGGAGCGGCGTGGATGCAG                   | OLEY453          | GCGCGGCTTCCGATTGGTCT                             | QPCR                |
| TGFB3       | OLEY456             | GACACTGTGCGTGAGTGGCTGT                 | OLEY457          | GAGGCGCCCCAGATCTCCAC                             | QPCR                |
| CAMK2N1     | OLEY458             | AGAACAAGCGGCCGCCAAG                    | OLEY459          | ACACCAGGAGGTGCCTTGTCG                            | QPCR                |
| JAG1        | OLEY460             | ACGACCGCAACCGCATCGTG                   | OLEY461          | AAAGTGGGCAACGCCCGTGT                             | QPCR                |
| MMP9        | OLEY462             | GGTGCCTTTGGACACGCACGA                  | OLEY463          | GGCACTGCCAAAGCAGGACG                             | QPCR                |
| PAI1        | OLEY464             | ACCGCCAATCGCAAGGCACC                   | OLEY465          | CCCCGAAGTCTGAGGCCAGGT                            | QPCR                |
| TMEFF1      | OLEY466             | CCCGGCGCAAAGGCAAGAG                    | OLEY467          | GTCCCCATTTGATCCACAGACAGGA                        | QPCR                |
| CCND1       | OLEY468             | CCGCAATGACCCCGCACGAT                   | OLEY469          | TGCCACCATGGAGGGCGGAT                             | QPCR                |
| MSX1        | OLEY474             | GAGAGCCCCGAGAAGCCCGA                   | OLEY475          | TCCGCGGCTTACGGTTCGTC                             | QPCR                |
| SMAD3       | OLEY476             | AGGCGGTCAAGAGCCTGGTCA                  | OLEY477          | CATCGCCACAGGCGGCAGTA                             | QPCR                |
| IGFBP4      | OLEY478             | TGATGCACGGGCAAGGCGTG                   | OLEY479          | CCTGCGGTCATGGGCGCTAC                             | QPCR                |
| miR-106b~25 | BamHI-<br>106b~25 F | GGGGATCCATAGCCATGTGCCGCGAGAAGCAGCCCATG | EcoRI -106b~25 R | GGGAATTCCTAGCTGTCTGCCCTTGCTCTCCTAGAAGAGAG        | Cloning miR cluster |
| miR-106b    |                     |                                        | OLEY382          | GGGAATTCTAGCTCAGCAGTAGGTTGGGTAATCACACTACCTGCACGA | Cloning miR-106b    |
| miR-93      | OLEY384             | GGGGATCCTGTGGGTACTTGCTGCTCCAGCAGGGCACG | OLEY383          | GGGAATTCTTGCCCAAGTCTCCGCCTCTCAACACTGGC           | Cloning miR-93      |
| miR-25      | OLEY385             | GGGGATCCACCCAACCTACTGCTGAGCTAGCACTTCCC |                  |                                                  | Cloning miR-25      |
